# Supplementary material
Source: HighWire-hosted journal article supplement (https://www.cfp.ca/highwire/filestream/32894/field_highwire_adjunct_files/1/17_DeprescribingAntipsychotics_Appendix.pdf)
Supplement: 17_DeprescribingAntipsychotics_Appendix.pdf [file 17_DeprescribingAntipsychotics_Appendix.pdf]

**Appendix 1. Expertise, roles and responsibilities, and conflicts of interest for the guideline development team members and support staff.**

| <b>Guideline Member</b>                   | <b>Expertise</b>                                                                                 | <b>Guideline Role and Section Responsibilities</b>                                                                                                                                                 | <b>Conflict(s) of Interest</b>                                                                                                                                                                                                                                                                                                                                                                                                        |
|-------------------------------------------|--------------------------------------------------------------------------------------------------|----------------------------------------------------------------------------------------------------------------------------------------------------------------------------------------------------|---------------------------------------------------------------------------------------------------------------------------------------------------------------------------------------------------------------------------------------------------------------------------------------------------------------------------------------------------------------------------------------------------------------------------------------|
| <b>Guideline development team members</b> |                                                                                                  |                                                                                                                                                                                                    |                                                                                                                                                                                                                                                                                                                                                                                                                                       |
| Lise Bjerre                               | Family physician (Family Health Team)                                                            | <ul style="list-style-type: none"> <li>• Overall lead</li> <li>• Introduction</li> <li>• Key points</li> <li>• Recommendations</li> <li>• Clinical considerations</li> <li>• Conclusion</li> </ul> | None declared                                                                                                                                                                                                                                                                                                                                                                                                                         |
| Barbara Farrell                           | Pharmacist (Geriatric Day Hospital, lead on the Deprescribing guidelines in the elderly project) | <ul style="list-style-type: none"> <li>• Implementation</li> <li>• Gaps in knowledge</li> <li>• Resource implications and cost-effectiveness</li> <li>• Other guidelines</li> </ul>                | Dr. Farrell has received research funding for the purposes of developing this guideline; received financial payments from Institute for Healthcare Improvement and Commonwealth Fund for deprescribing guidelines summary and from Ontario Long-Term Care Physicians Association, Ontario Pharmacists Association, Canadian Society of Hospital Pharmacists and European Association of Hospital Pharmacists for speaking engagements |
| Lyla Graham                               | Family physician (Long Term Care)                                                                | <ul style="list-style-type: none"> <li>• Values and preferences</li> <li>• Clinical considerations</li> </ul>                                                                                      | None declared                                                                                                                                                                                                                                                                                                                                                                                                                         |
| Genevieve Lemay                           | Geriatrician                                                                                     | <ul style="list-style-type: none"> <li>• Clinical considerations</li> </ul>                                                                                                                        | None declared                                                                                                                                                                                                                                                                                                                                                                                                                         |
| Lisa McCarthy                             | Pharmacist (community and primary care settings)                                                 | <ul style="list-style-type: none"> <li>• Resource implications and cost-effectiveness</li> <li>• Other guidelines</li> </ul>                                                                       | Dr. McCarthy has received funds from the University of Western Ontario for a speaking engagement."                                                                                                                                                                                                                                                                                                                                    |
| Lalitha Raman-Wilms                       | Pharmacist (Long Term Care)                                                                      | <ul style="list-style-type: none"> <li>• Values and preferences</li> </ul>                                                                                                                         | None declared                                                                                                                                                                                                                                                                                                                                                                                                                         |
| Carlos Rojas-Fernandez                    | Pharmacist (geriatrics, primary and long-term care settings)                                     | <ul style="list-style-type: none"> <li>• Review of review of harms</li> <li>• Clinical considerations</li> </ul>                                                                                   | None declared                                                                                                                                                                                                                                                                                                                                                                                                                         |
| Samir Sinha                               | Geriatrician                                                                                     | <ul style="list-style-type: none"> <li>• Values and preferences</li> </ul>                                                                                                                         | None declared                                                                                                                                                                                                                                                                                                                                                                                                                         |
| Vivian Welch                              | Clinical epidemiology methodologist                                                              | <ul style="list-style-type: none"> <li>• Summary of findings and quality of evidence</li> <li>• GRADE review</li> </ul>                                                                            | None declared                                                                                                                                                                                                                                                                                                                                                                                                                         |
| Andrew Wiens                              | Geriatric psychiatrist                                                                           | <ul style="list-style-type: none"> <li>• Clinical considerations</li> </ul>                                                                                                                        | None declared                                                                                                                                                                                                                                                                                                                                                                                                                         |
| <b>Support persons</b>                    |                                                                                                  |                                                                                                                                                                                                    |                                                                                                                                                                                                                                                                                                                                                                                                                                       |

|               |                    |                                                                                                                                                                                              |               |
|---------------|--------------------|----------------------------------------------------------------------------------------------------------------------------------------------------------------------------------------------|---------------|
| Matthew Hogel | Research Associate | <ul style="list-style-type: none"> <li>• Guideline coordinator</li> <li>• Scope</li> <li>• Methods</li> <li>• Summary of findings and quality of evidence</li> <li>• GRADE review</li> </ul> | None declared |
| Wade Thompson | Pharmacist         | <ul style="list-style-type: none"> <li>• Insomnia systematic review</li> <li>• GRADE review</li> </ul>                                                                                       | None declared |

## Appendix 2. Evidence tables

### I. Continuation versus withdrawal of antipsychotic medication for the treatment of BPSD.

| Quality assessment                                    |                   |              |               |              |              |                      | № of patients | Effect                                                                                                                                | Quality                       | Importance |
|-------------------------------------------------------|-------------------|--------------|---------------|--------------|--------------|----------------------|---------------|---------------------------------------------------------------------------------------------------------------------------------------|-------------------------------|------------|
| № of studies                                          | Study design      | Risk of bias | Inconsistency | Indirectness | Imprecision  | Other considerations |               |                                                                                                                                       |                               |            |
| Success of withdrawal of antipsychotic medication     |                   |              |               |              |              |                      |               |                                                                                                                                       |                               |            |
| 7                                                     | randomised trials | not serious  | serious       | not serious  | Not serious  | not serious          | 365           | No difference in dropout rate in seven studies. Significant increase in likelihood of relapse in deprescribing group in one study.    | ⊕⊕⊕O <sup>4</sup><br>MODERATE |            |
| Change in behavioural and psychological symptoms      |                   |              |               |              |              |                      |               |                                                                                                                                       |                               |            |
| 6                                                     | randomised trials | not serious  | serious       | not serious  | Not serious  | not serious          | 422           | No difference in the change in behavioural and psychological symptoms between the deprescribing and the continuation groups.          | ⊕⊕⊕O <sup>4</sup><br>MODERATE |            |
| Symptoms of withdrawal from antipsychotic medications |                   |              |               |              |              |                      |               |                                                                                                                                       |                               |            |
| 1                                                     | randomised trials | not serious  | not serious   | not serious  | very serious | not serious          | 30            | Decreased sleep efficiency in the deprescribing group compared to continuation                                                        | ⊕⊕OO <sup>1</sup><br>LOW      |            |
| Adverse events related to antipsychotic medications   |                   |              |               |              |              |                      |               |                                                                                                                                       |                               |            |
| 4                                                     | randomised trials | not serious  | serious       | not serious  | Not serious  | not serious          | 366           | No difference in adverse events between the deprescribing and continuation groups.                                                    | ⊕⊕⊕O <sup>4</sup><br>MODERATE |            |
| Change in cognitive function                          |                   |              |               |              |              |                      |               |                                                                                                                                       |                               |            |
| 6                                                     | randomised trials | not serious  | serious       | not serious  | Not serious  | not serious          | 422           | No difference in the change in cognitive function between the deprescribing and continuation groups.                                  | ⊕⊕⊕O <sup>4</sup><br>MODERATE |            |
| Mortality                                             |                   |              |               |              |              |                      |               |                                                                                                                                       |                               |            |
| 2                                                     | randomised trials | not serious  | serious       | not serious  | serious      | not serious          | 275           | No difference in mortality between the groups in one study. Significant decrease in mortality in the deprescribing group in one study | ⊕⊕OO <sup>2</sup><br>LOW      |            |
| Change in quality of life                             |                   |              |               |              |              |                      |               |                                                                                                                                       |                               |            |
| 3                                                     | randomised trials | not serious  | not serious   | serious      | not serious  | not serious          | 285           | No difference in the change in measures of quality of life between the deprescribing and continuation groups.                         | ⊕⊕⊕O <sup>3</sup><br>MODERATE |            |

#### Clarifications

1. Downgraded two levels for imprecision due to lack of optimal information size.
2. Downgraded one level for imprecision due to lack of optimal information size and one level for inconsistency as the two studies reported opposite results.
3. Downgraded one level for imprecision due to of optimal information size.
4. Downgraded one level for inconsistency due to the heterogeneity of the outcome measures.

## II. Use of antipsychotic versus placebo for the treatment of insomnia.

| Quality assessment                              |                   |                      |                          |                         |                             |                      | No of patients |         | Effect            |                                               | Quality          |
|-------------------------------------------------|-------------------|----------------------|--------------------------|-------------------------|-----------------------------|----------------------|----------------|---------|-------------------|-----------------------------------------------|------------------|
| No of studies                                   | Design            | Risk of bias         | Inconsistency            | Indirectness            | Imprecision                 | Other considerations | Quetiapine     | Control | Relative (95% CI) | Absolute                                      |                  |
| Increase in total sleep time                    |                   |                      |                          |                         |                             |                      |                |         |                   |                                               |                  |
| 1                                               | randomised trials | serious <sup>1</sup> | no serious inconsistency | no serious indirectness | very serious <sup>2,3</sup> | none                 | 7              | 6       | -                 | MD 52.68 higher (27.27 lower to 132.6 higher) | ⊕○○○<br>VERY LOW |
| Reduction in sleep latency from baseline        |                   |                      |                          |                         |                             |                      |                |         |                   |                                               |                  |
| 1                                               | randomised trials | serious <sup>1</sup> | no serious inconsistency | no serious indirectness | very serious <sup>2,3</sup> | none                 | 7              | 6       | -                 | MD 72.44 higher (2.65 lower to 147.5 higher)  | ⊕○○○<br>VERY LOW |
| Improvement in sleep satisfaction from baseline |                   |                      |                          |                         |                             |                      |                |         |                   |                                               |                  |
| 1                                               | randomised trials | serious <sup>1</sup> | no serious inconsistency | no serious indirectness | very serious <sup>2,3</sup> | none                 | 7              | 6       | -                 | MD 6.16 higher (12.32 lower to 24.64 higher)  | ⊕○○○<br>VERY LOW |

### Clarifications

<sup>1</sup> Concerns regarding baseline imbalance, incomplete outcome data

<sup>2</sup> Sample size less than 400

<sup>3</sup> Uncertainty of results owing to wide confidence intervals

### Appendix 3: Ranges of frequency ratios for harms associated with antipsychotics, and related references.

| Harm            | Odds ratios<br>(and 95% confidence intervals) | Absolute Rates<br>(Drug vs. Placebo) | Reference |
|-----------------|-----------------------------------------------|--------------------------------------|-----------|
| CVAEs           | 2.13 (1.2, 3.75)                              | 1.9% vs 0.9%                         | [1]       |
| Death           | 1.54 (1.06, 2.23)                             | 3.5% vs 2.3%                         | [1]       |
| Abnormal gait   | 3.42 (1.78,6.56)                              | 10% vs 2%                            | [1]       |
| Somnolence      | 2.84 (2.25,3.58)                              | 17% vs 7%                            | [1]       |
| Drowsiness      | 2.38 - 8.2 (1.76, 29.9)                       | Not available                        | [2]       |
| Edema           | 1.99 (1.2,3.3)                                | 9% vs 4%                             | [1]       |
| EPS             | 1.51 (1.2,1.91)                               | 13% vs 8%                            | [1]       |
| UTIs            | 1.28 (1.02,1.61)                              | 16% vs 12%                           | [1]       |
| Injury or falls | 0.93 (0.78,1.11)                              | 21% vs 22%                           | [1]       |

Full reference list for eligible systematic reviews reporting on harms of antipsychotic use:

- (1) Schneider LS, Dagerman K, Insel PS. Efficacy and Adverse Effects of Atypical Antipsychotics for Dementia: Meta-analysis of Randomized, Placebo-Controlled Trials. *The American Journal of Geriatric Psychiatry* 2006;14:191-210.
- (2) Ballard C, Howard R. Neuroleptic drugs in dementia: Benefits and harm. 2006;7:492-500.
- (3) Atti AR, Gozzi BF, Zuliani G, Bernabei V, Scudellari P, Berardi D, et al. A systematic review of metabolic side effects related to the use of antipsychotic drugs in dementia. 2014;26:19-37.
- (4) Ballard C, Howard R. Neuroleptic drugs in dementia: benefits and harm. *Nat Rev Neurosci* 2006 Jun;7(6):492-500.
- (5) Bhana N, Spencer CM. Risperidone. A review of its use in the management of the behavioural and psychological symptoms of dementia. *Drugs and Aging* 2000;16:451-71.
- (6) Burke AD, Tariot PN. Atypical antipsychotics in the elderly: a review of therapeutic trends and clinical outcomes. *Expert Opin Pharmacother* 2009 Oct;10(15):2407-14.
- (7) Carson S, McDonagh MS, Peterson K. A Systematic Review of the Efficacy and Safety of Atypical Antipsychotics in Patients with Psychological and Behavioral Symptoms of Dementia. *Journal of the American Geriatrics Society* 2006;54:354-61.
- (8) Daiello LA, Beier MT, Hoffmann VP, Kennedy JS. Pharmacotherapy of Behavioral and Psychological Symptoms of Dementia: A Review of Atypical Antipsychotics. *Consultant Pharmacist* 2003;18:138-57.
- (9) Gareri P, De FP, De FS, Marigliano N, Ferreri IG, De SG. Adverse effects of atypical antipsychotics in the elderly: a review. *Drugs Aging* 2006;23(12):937-56.
- (10) Katz I, De Deyn PP, Mintzer J, Greenspan A, Zhu Y, Brodaty H. The efficacy and safety of risperidone in the treatment of psychosis of Alzheimer's disease and mixed dementia: A meta-

analysis of 4 placebo-controlled clinical trials. *International Journal of Geriatric Psychiatry* 2007;22:475-84.

- (11) Kryzhanovskaya LA, Jeste DV, Young CA, Polzer JP, Roddy TE, Jansen JF, et al. A review of treatment-emergent adverse events during olanzapine clinical trials in elderly patients with dementia. *Journal of Clinical Psychiatry* 2006;67:933-45.
- (12) Lee PE, Gill SS, Freedman M, Bronskill SE, Hillmer MP, Rochon PA. Atypical antipsychotic drugs in the treatment of behavioural and psychological symptoms of dementia: Systematic review. *British Medical Journal* 2004;329:75-8.
- (13) Lonergan E, Luxenberg J, Colford J. Haloperidol for agitation in dementia. *Cochrane database of systematic reviews (Online)* 2002;CD002852.
- (14) Ma H, Huang Y, Cong Z, Wang Y, Jiang W, Gao S, et al. The efficacy and safety of atypical antipsychotics for the treatment of dementia: A meta-analysis of randomized placebo-controlled trials. *Journal of Alzheimer's Disease* 2014;42:915-37.
- (15) Maher AR, Maglione M, Bagley S, Suttrop M, Hu JH, Ewing B, et al. Efficacy and comparative effectiveness of atypical antipsychotic medications for off-label uses in adults: A systematic review and meta-analysis. *JAMA: Journal of the American Medical Association* 2011;306:1359-69.
- (16) Mazzucco S, Cipriani A, Barbui C, Monaco S. Antipsychotic drugs and cerebrovascular events in elderly patients with dementia: A systematic review. *Mini-Reviews in Medicinal Chemistry* 2008;8:776-83.
- (17) McShane R. Drug treatments for behavioural and psychological symptoms of dementia. A review. *CPD Bulletin Old Age Psychiatry* 2000;2:47-50.
- (18) Mittal V, Kurup L, Williamson D, Muralee S, Tampi RR. Risk of cerebrovascular adverse events and death in elderly patients with dementia when treated with antipsychotic medications: A literature review of evidence. *American Journal of Alzheimer's Disease and Other Dementias* 2011;26:10-28.
- (19) Schneider LS, Dagerman KS, Insel P. Risk of death with atypical antipsychotic drug treatment for dementia: meta-analysis of randomized placebo-controlled trials. *JAMA* 2005 Oct 19;294(15):1934-43.
- (20) Seitz DP, Gill SS, Herrmann N, Brisbin S, Rapoport MJ, Rines J, et al. Pharmacological treatments for neuropsychiatric symptoms of dementia in long-term care: a systematic review. *Int Psychogeriatr* 2013 Feb;25(2):185-203.
- (21) Trifiro G, Sultana J, Spina E. Are the safety profiles of antipsychotic drugs used in dementia the same? An updated review of observational studies. *Drug Saf* 2014 Jul;37(7):501-20.
- (22) van Iersel MB, Zuidema SU, Koopmans RTCM, Verhey FRJ, Rikkert MGMO. Antipsychotics for Behavioural and Psychological Problems in Elderly People with Dementia: A Systematic Review of Adverse Events. *Drugs & Aging* 2005;22:845-58.



## **Appendix 4: Evidence review**

### **Summary of Systematic Review Findings**

#### Deprescribing antipsychotics for the treatment of BPSD

##### *Included studies*

The 2013 Cochrane review included nine studies [1-9]. These studies had a median minimum duration of treatment with antipsychotics of 3 months (range 1-6 months; average 3.3 months +/- 1.5 months) prior to attempting withdrawal. Due to differences in study design and BPSD scales, a pooled analysis could not be performed. A narrative summary of the patient-important outcomes of interest is presented in Appendix 2.

##### *Study outcomes*

Success of antipsychotic withdrawal, measured as the ability of participants to reach the end of the study phase without removal from the study due to reasons such as death, symptom relapse, adverse effects of antipsychotic medication withdrawal, was evaluated in seven studies comprising a total of 365 participants [1,3,5-9]. There was no difference in the dropout rate in six studies. In one study, there was a higher rate of dropout in the withdrawal group than in the continuation group resulting from symptom relapse. The quality of evidence for success of deprescribing was graded as moderate due to concerns surrounding imprecision relating to the heterogeneity of the results.

Behavioural and psychological symptoms of dementia were evaluated in six studies involving 422 participants using a variety of validated scales (see table) as well as using counts of instances of

aggressive behavior [1-4,8,9]. The time period over which these symptoms were evaluated ranged from 1-12 months (median = 3). There was no significant difference in the change in BPSD

**Table – Scales used in BPSD systematic review**

| <b>BPSD Scales</b>               |                                                           |
|----------------------------------|-----------------------------------------------------------|
| BDS                              | Blessed Dementia Scale                                    |
| BEHAVE-AD                        | Behavioural Pathology in Alzheimer's disease rating scale |
| BPRS                             | Brief Psychiatric Rating Scale                            |
| CGI                              | Clinical Global Impression                                |
| CMAI                             | Cohen-Mansfield Agitation Inventory                       |
| NPI                              | Neuropsychiatric Inventory                                |
| <b>Adverse Events Scales</b>     |                                                           |
| AIMS                             | Abnormal Involuntary Movement Scale                       |
| ESRS                             | Extrapyramidal Symptom Rating Scale                       |
| M-UPDS                           | Modified Unified Parkinson's Disease Scale                |
|                                  | Physical Self-Maintenance Scale                           |
| TESS                             | Treatment of Emergent Symptoms Scales                     |
| <b>Cognitive Function Scales</b> |                                                           |
| ADAS-Cog                         | Alzheimer's Disease Assessment Scale - cognitive          |
| CAS                              | Cognitive Assessment Scale                                |
| LPRS                             | London Psychogeriatric Rating Scale                       |
| MDRS                             | Mattis Dementia Rating Scale                              |
| MMSE                             | Mini-Mental State Examination                             |
| SCAGS                            | Sandoz Cognitive Assessment Geriatric Scale               |
| SIB                              | Severe Impairment Battery                                 |
| SMMSE                            | Standardized Mini-Mental State Examination                |
| <b>Quality of Life Scales</b>    |                                                           |
| ADL                              | Bristol Activities of Daily Living                        |
| BFAS                             | Blessed Functional Activity Scale                         |
| DCM                              | Dementia Care Mapping                                     |

between the continuation and withdrawal group in any of the six studies. The quality of evidence was moderate due to concerns about imprecision relating to the variance in scales used to evaluate this outcome.

Change in cognitive function was measured in six studies, which involved 422 participants [2,4-7,9]. Cognitive function was measured using various scales (see table). There was no difference in the change in cognitive function between the continuation and the withdrawal group in any of the six studies. The quality of evidence was rated as moderate due to the variation in the scales used across the studies to measure cognitive function.

Mortality was measured in two studies consisting of 275 participants [2,6]. One of these studies showed no significant difference in mortality (2/70 in the continuation group vs. 1/67 in the deprescribing group; RR 1.91 [0.18-20.62]) between groups after 32 weeks of having been randomized to continue or stop taking antipsychotics. The second study reported a significant decrease in mortality (39/83 who continued treatment vs. 27/82 in the deprescribing group; HR 0.58 [0.36-0.92]) in the group withdrawn from antipsychotic medication compared to the group continued on antipsychotic medication after a period lasting up to 54 months. The quality of evidence for this outcome was rated as low. It was rated down one level for imprecision due to the limited number of participants in the two studies, and was rated down one level for inconsistency due to the conflicting results in the two studies.

Change in quality of life measured in individuals removed from antipsychotics versus those continued on the drugs was evaluated in three studies involving 285 participants using several scales (see table) [1,2,5]. No significant difference was observed between groups in any of the three studies. The quality of evidence was rated as moderate due to the limited number of participants in the studies which evaluated this outcome.

### *Withdrawal symptoms in antipsychotic deprescribing trials*

Symptoms of withdrawal from antipsychotic medication were reported in one study consisting of 30 participants [8]. This study reported that those withdrawn from their antipsychotic medication experienced decreased sleep efficiency when compared to those who continued on their antipsychotic medication. The quality of evidence was very low, as serious concerns existed about the low number of participants in the single study used to evaluate the outcome.

### *Adverse effects of continued antipsychotic use in deprescribing trials*

Some adverse effects of antipsychotic medications were prospectively measured in four studies, which included 366 participants, using a variety of validated scales (see table) [2,4,6,9]. There was no difference in adverse effects between groups in any of the four studies that measured it. The quality of evidence was rated as moderate owing to the heterogeneity in scales used to evaluate this outcome.

### Use of antipsychotics for the treatment of insomnia

#### *Included study and study outcomes*

Our systematic review found one study, with 13 participants, that met inclusion criteria [10]. The study reported increases in total sleep time [52.68 min (95% confidence interval (CI): -27.27 to 132.6)] and sleep satisfaction [6.16 out of 100 (95% CI: -12.32 to 24.64)], and a decrease in latency to sleep [72.44 min (95% CI: -2.65 to 147.5)] in the group prescribed an antipsychotic compared to the group given placebo, however, none were significant. Summary of findings tables with further details are presented in Appendix 2. The quality of evidence for all outcomes of antipsychotic effectiveness in insomnia was judged to be very low, due to concerns about high risk

of bias (attrition, reporting and other), small sample size and subsequent imprecise results. The authors did not report rates of adverse effects nor nighttime awakenings, and did not have this data available when contacted. There were also baseline imbalances with respect to sleep parameters – the quetiapine group had a lower total sleep time, longer sleep latency and poorer sleep satisfaction at baseline.

### **Harms of continued antipsychotic use**

In addition to the well-known side effects of antipsychotics (drowsiness, headache, extrapyramidal symptoms, weight gain, etc. [11]), there has been a heightened awareness of more serious adverse effects since the mid-2000s. A review of reviews of harms associated with antipsychotic drugs was conducted; a librarian conducted an English only literature search (strategy available upon request) and 2 research assistants independently reviewed the results using the following inclusion criteria to identify relevant literature: systematic reviews of RCTs or observational studies, and any outcomes resulting in harms. The search retrieved 741 publications, of which 21 were retained and 720 were excluded (see Appendix 3). Of those 21, five contained quantitative data on the occurrence of adverse events in patients taking antipsychotics. The range of frequency ratios from these studies are outlined in Appendix 3. The most concerning harms are the 1.5-2.0 fold increase in risk of death and the 2-fold increased risk of cerebrovascular events (CVAEs), though it is important to bear in mind that the absolute risks [3.5% vs. 2.3 % and 1.9% vs. 0.9% (medication vs. placebo), respectively] are low [12], which translates to an  $NNH_{1year}$  of 83-100. These data led the FDA and HC to issue warnings about the increased risk for CVAEs and death in this population [13,14].

It should also be noted that results in the review of observational studies were highly heterogeneous [15] and in many cases, recent observational studies have failed to confirm serious outcomes (death, CVAEs) with antipsychotic use [16-21].

## **Values and preferences related to antipsychotics**

### *Reasons for use*

Family members of community-dwelling individuals with dementia consulted during care reviews believe that antipsychotics use is intended to aid sleep, help family members manage care tasks and help principal care givers cope; others were unaware of the reasons for prescribing antipsychotics [22]. Amongst front-line LTC providers and family members, the reasons most cited during interviews for the use of antipsychotics are the presence of physically or verbally aggressive behaviours and problems with daily care [23]. Results from surveys of front-line care providers and family members reported that on average, about half of their patients/residents or family members with dementia and behavioral disturbances were expected to benefit from antipsychotics [24]. This likely explains a general feeling that the benefits of using antipsychotics outweigh the risks of side-effects [24,25].

### *Awareness of harms and benefits*

Both family members and professional caregivers appear to understand the potential negative outcomes associated with using antipsychotics. Family members reported in interviews that the sedating effects of antipsychotics are distressing, unhelpful and that antipsychotics can be harmful even in the absence of severe side effects, with some family members and primary caregivers feeling patients' quality of life is better without antipsychotics [26]. In interviews and focus groups, some relatives reported removing individuals from residential settings to protect them

against being prescribed antipsychotics [27]. Other studies, using tests as well as patient and caregiver interviews, also suggest that use of antipsychotics, including in an institutional setting [28], is an independent predictor of worsened patient quality of life (QOL) [26,29].

Despite awareness of the negative outcomes of using antipsychotics for BPSD, there is evidence that they can have a positive impact on the caregivers. An RCT with three different treatment arms that evaluated the efficacy of haloperidol and trazodone against placebo for treating agitation in Alzheimer's Disease showed that the combined effect of antipsychotic treatment versus placebo resulted in a small but statistically significant reduction in caregiver burden [30].

Although the negative effects of antipsychotics are apparent to providers, caregivers, and family members, they also seem to have an understanding of the difficulties involved in discontinuing the use of antipsychotics. These barriers include the need for education of physicians, staff, and families [31] as well as inadequate staffing and other resources to support effective non-pharmacological approaches to managing behavioural issues [31,32]. The latter may be the primary reasons for continuing treatment [33]. Primary care physicians may be reluctant to discontinue antipsychotics if they were initially prescribed by another physician [34-37]. This represents a significant challenge if there is little communication between health care providers during transitions in care, without adequate identification of indications for prescribing antipsychotics [32]. Schultz (2008) notes that treatment decisions about antipsychotics are usually influenced by the expectations of clinicians and families [38], therefore, when attempting to withdraw antipsychotics, support from family and care providers can increase everyone's comfort level in doing so and enable a more effective outcome [22].

## **Resource implications and cost-effectiveness**

In Canada, \$75 million was spent on antipsychotics for seniors during the second quarter of 2014. This represents an increase of 21% in costs over the last four years, despite the cost of individual medications declining due to the introduction of generic prices as patent protection expires. Ninety-seven percent (97%) of these costs were attributable to atypical antipsychotics, 78% to quetiapine, risperidone and olanzapine [39]. There is significant variability within Canada with respect to antipsychotic spending between provinces (after adjustments for age), with Quebec being at the high end (60% above the average for the rest of Canada) and Newfoundland and Labrador being well below average (27% below the average for the rest of Canada) [40]. In 2013, in Ontario alone, approximately \$35 million was spent on antipsychotics for patients aged 65 and over and significant variability amongst LTC facilities with respect to antipsychotic use persists [41].

In terms of volume, atypical antipsychotics are prescribed at higher numbers in the community than in LTC facilities, however, the rate of prescribing is 14 times higher in LTC facilities (22 per 1000 community patients vs. 328 per 1000 LTC residents) [42]. In a March 2013 survey of Ontario LTC homes, the prevalence of antipsychotic use amongst residents averaged 28.8% per LTC, with a maximum reported rate of 67.2% [41]. One in four of these long-term care residents taking an antipsychotic do not have a diagnosis of psychosis [43], and 22.4 % of residents in Canadian long-term care homes in 2014 were taking antipsychotics chronically [44].

Cost-effectiveness studies examining treatment options for BPSD show that behavioural interventions, such as cognitive stimulation therapy, are projected to reduce costs. A 2011 UK analysis reported that behavioural interventions resulted in a net benefit of approximately £54.9

million (approximately \$87 million CDN at that time) per year compared to antipsychotic use for BPSD, when the value of health care costs savings, from avoided falls and strokes, and quality of life improvements were considered [45]. For caregivers, antipsychotics have been shown to have a small but significant effect on caregiver burden, as they have been associated with reduced time for caregivers spent in direct caregiving roles [46,47]. These benefits, however, are similar to the effect of support groups and psychoeducational interventions for caregivers [46]. The cost implications are less clear, partly because estimates of the value of informal caregiving are highly variable, ranging from \$41,669 to \$56,290 USD (\$53,833 to \$74,019 CDN) depending on the method used to value informal care [48]. The economic value of informal caregiving is much greater than spending for formal home health care and nursing home care [46].

## Reference List

- (1) Ballard CG, Thomas A, Fossey J, Lee L, Jacoby R, Lana MM, et al. A 3-month, randomized, placebo-controlled, neuroleptic discontinuation study in 100 people with dementia: the neuropsychiatric inventory median cutoff is a predictor of clinical outcome. *J Clin Psychiatry* 2004 Jan;65(1):114-9.
- (2) Ballard C, Hanney ML, Theodoulou M, Douglas S, McShane R, Kossakowski K, et al. The dementia antipsychotic withdrawal trial (DART-AD): long-term follow-up of a randomised placebo-controlled trial. *Lancet Neurol* 2009;8(2):151-7. Epub 2009 Jan 8.
- (3) Bridges-Parlet S, Knopman D, Steffes S. Withdrawal of neuroleptic medications from institutionalized dementia patients: results of a double-blind, baseline-treatment-controlled pilot study. *J Geriatr Psychiatry Neurol* 1997 Jul;10(3):119-26.
- (4) Cohen-Mansfield J, Lipson S, Werner P, Billig N, Taylor L, Woosley R. Withdrawal of haloperidol, thioridazine, and lorazepam in the nursing home: a controlled, double-blind study. *Arch Intern Med* 1999 Aug 9;159(15):1733-40.
- (5) Devanand DP, Pelton GH, Cunqueiro K, Sackeim HA, Marder K. A 6-month, randomized, double-blind, placebo-controlled pilot discontinuation trial following response to haloperidol treatment of psychosis and agitation in Alzheimer's disease. *Int J Geriatr Psychiatry* 2011 Sep;26(9):937-43.

- (6) Devanand DP, Mintzer J, Schultz SK, Andrews HF, Sultzer DL, de la Pena D, et al. Relapse risk after discontinuation of risperidone in Alzheimer's disease. *N Engl J Med* 2012 Oct 18;367(16):1497-507.
- (7) Findlay DJ, Sharma J, McEwen J, Ballinger BR, MacClennan WJ, McHarg AM. Double-blind controlled withdrawal of thioridazine treatment in elderly female inpatients with senile dementia. *International Journal of Geriatric Psychiatry* 1989;4(2):115-20.
- (8) Ruths S, Straand J, Nygaard HA, Aarsland D. Stopping antipsychotic drug therapy in demented nursing home patients: a randomized, placebo-controlled study--the Bergen District Nursing Home Study (BEDNURS). *Int J Geriatr Psychiatry* 2008 Sep;23(9):889-95.
- (9) van RR, Clarke D, Conn D, Herrmann N, Eryavec G, Cohen T, et al. A randomized, placebo-controlled trial of the discontinuation of long-term antipsychotics in dementia. *Int Psychogeriatr* 2002 Jun;14(2):197-210.
- (10) Tassniyom K, Paholpak S, Tassniyom S, Kiewyoo J. Quetiapine for primary insomnia: a double blind, randomized controlled trial. *J Med Assoc Thai* 2010 Jun;93(6):729-34.
- (11) Wolters Kluwer. UpToDate. Last updated 2016. Last accessed Aug. 1, 2016. Available at <http://www.uptodate.com/home>.
- (12) Schneider LS, Dagerman KS, Insel P. Risk of death with atypical antipsychotic drug treatment for dementia: meta-analysis of randomized placebo-controlled trials. *JAMA* 2005 Oct 19;294(15):1934-43.
- (13) Health Canada. Atypical Antipsychotic Drugs and Dementia - Adivsories, Warnings and Recalls for Health Professionals. Health Canada. Last updated June 22, 2005. Last accessed Nov. 3, 2016. Available at <http://www.healthycanadians.gc.ca/recall-alert-rappel-avis/hc-sc/2005/14307a-eng.php>.
- (14) Schneider LS, Dagerman K, Insel PS. Efficacy and adverse effects of atypical antipsychotics for dementia: meta-analysis of randomized, placebo-controlled trials. *Am J Geriatr Psychiatry* 2006 Mar;14(3):191-210.
- (15) Trifiro G, Sultana J, Spina E. Are the safety profiles of antipsychotic drugs used in dementia the same? An updated review of observational studies. *Drug Saf* 2014 Jul;37(7):501-20.
- (16) Barnett MJ, Wehring H, Perry PJ. Comparison of risk of cerebrovascular events in an elderly VA population with dementia between antipsychotic and nonantipsychotic users. *J Clin Psychopharmacol* 2007 Dec;27(6):595-601.
- (17) Mehta S, Johnson ML, Chen H, Aparasu RR. Risk of cerebrovascular adverse events in older adults using antipsychotic agents: a propensity-matched retrospective cohort study. *J Clin Psychiatry* 2010 Jun;71(6):689-98.

- (18) Laredo L, Vargas E, Blasco AJ, Aguilar MD, Moreno A, Portoles A. Risk of cerebrovascular accident associated with use of antipsychotics: population-based case-control study. *J Am Geriatr Soc* 2011 Jul;59(7):1182-7.
- (19) Simoni-Wastila L, Ryder PT, Qian J, Zuckerman IH, Shaffer T, Zhao L. Association of antipsychotic use with hospital events and mortality among medicare beneficiaries residing in long-term care facilities. *Am J Geriatr Psychiatry* 2009 May;17(5):417-27.
- (20) Raivio MM, Laurila JV, Strandberg TE, Tilvis RS, Pitkala KH. Neither atypical nor conventional antipsychotics increase mortality or hospital admissions among elderly patients with dementia: a two-year prospective study. *Am J Geriatr Psychiatry* 2007 May;15(5):416-24.
- (21) Lopez OL, Becker JT, Chang YF, Sweet RA, Aizenstein H, Snitz B, et al. The long-term effects of conventional and atypical antipsychotics in patients with probable Alzheimer's disease. *Am J Psychiatry* 2013 Sep;170(9):1051-8.
- (22) O'Sullivan G. Ethical and effective: Approaches to residential care for people with dementia. 2013;12:111-21.
- (23) Bonner AF, Field TS, Lemay CA, Mazor KM, Andersen DA, Compher CJ, et al. Rationales that providers and family members cited for the use of antipsychotic medications in nursing home residents with dementia. *J Am Geriatr Soc* 2015 Feb;63(2):302-8.
- (24) Cornege-Blokland E, Kleijer BC, Hertogh CMPM, van Marum RJ. Reasons to prescribe antipsychotics for the behavioral symptoms of dementia: A Survey in dutch nursing homes among physicians, nurses, and family caregivers. 2012;13:80.
- (25) Gonzalez-Moneo MJ, Simo M, Pie M, Rivero D. Preferences of general practitioners and carers of Alzheimer patients regarding the use of neuroleptics for behavioural disorders in Alzheimer's disease. *Int J Geriatr Psychiatry* 2008 Oct;23(10):1095-7.
- (26) Mougias AA, Politis A, Lyketsos CC, Mavreas VG. Quality of life in dementia patients in Athens, Greece: Predictive factors and the role of caregiver-related factors. 2011;23:395-403.
- (27) Harding R, Peel E. 'He was like a zombie': off-label prescription of antipsychotic drugs in dementia. *Med Law Rev* 2013 Mar;21(2):243-77.
- (28) Ballard C, O'Brien J, James I, Mynt P, Lana M, Potkins D, et al. Quality of life for people with dementia living in residential and nursing home care: the impact of performance on activities of daily living, behavioral and psychological symptoms, language skills, and psychotropic drugs. *Int Psychogeriatr* 2001 Mar;13(1):93-106.
- (29) Albert SM, Del Castillo-Castaneda C, Sano M, Jacobs DM, Marder K, Bell K, et al. Quality of life in patients with Alzheimer's disease as reported by patient proxies. *J Am Geriatr Soc* 1996 Nov;44(11):1342-7.

- (30) Schoenmakers B, Buntinx F, De LJ. Can pharmacological treatment of behavioural disturbances in elderly patients with dementia lower the burden of their family caregiver? *Fam Pract* 2009 Aug;26(4):279-86.
- (31) Ellis ML, Molinari V, Dobbs D, Smith K, Hyer K. Assessing approaches and barriers to reduce antipsychotic drug use in Florida nursing homes. *Aging Ment Health* 2015;19(6):507-16.
- (32) Mavrodaris A, Philp I. Reducing antipsychotic prescriptions in primary care: A healthcare perspective. 2013;12:32-42.
- (33) Parsons C, McCorry N, Murphy K, Byrne S, O'Sullivan D, O'Mahony D, et al. Assessment of factors that influence physician decision making regarding medication use in patients with dementia at the end of life. 2014;29:281-90.
- (34) de Vries CS, van Diepen NM, Tromp TF, de Jong-van den Berg LT. Auditing GPs' prescribing habits: cardiovascular prescribing frequently continues medication initiated by specialists. *Eur J Clin Pharmacol* 1996;50(5):349-52.
- (35) Robertson J, Treloar CJ, Sprogis A, Henry DA. The influence of specialists on prescribing by GPs. A qualitative study. *Aust Fam Physician* 2003 Jul;32(7):573-6.
- (36) Tamblyn R, Huang A, Perreault R, Jacques A, Roy D, Hanley J, et al. The medical office of the 21st century (MOXXI): effectiveness of computerized decision-making support in reducing inappropriate prescribing in primary care. *CMAJ* 2003 Sep 16;169(6):549-56.
- (37) Scott I, Jayathissa S. Quality of drug prescribing in older patients: is there a problem and can we improve it? *Intern Med J* 2010 Jan;40(1):7-18.
- (38) Schultz SK. Atypical antipsychotic medications in Alzheimer's disease: effectiveness versus expectations. *Am J Psychiatry* 2008 Jul;165(7):787-9.
- (39) Ontario Drug Policy Research Network. Antipsychotic Use in the Elderly. Toronto, ON: Ontario Drug Policy Research Network; 2015.
- (40) Morgan S, Smolina K, Mooney D, Raymond C, Bowen M, Gorczynski C, et al. The Canadian Rx Atlas, 3rd Ed. Vancouver, BC: UBC Centre for Health Services and Policy Research; 2013.
- (41) Health Quality Ontario. Looking for Balance - Antipsychotic medication use in Ontario long-term care homes. Toronto, ON: Queen's Printer for Ontario; 2015.
- (42) Ontario Drug Policy Research Network. The Use of Atypical Antipsychotics Among the Elderly. Toronto, ON: Ontario Drug Policy Research Network; 2014.
- (43) Canadian Institute for Health Information. Your Health System. Last updated 2016. Last accessed Apr. 3, 2016. Available at

<http://yourhealthsystem.cihi.ca/hsp/enbref?lang=en#!/indicators/008/potentially-inappropriate-use-of-antipsychotics-in-long-term-care;/mapC1;mapLevel2;/>

- (44) Canadian Institute for Health Information. Use of Antipsychotics Among Seniors Living in Long-Term Care Facilities, 2014. Ottawa, ON: Canadian Institute for Health Information; 2016.
- (45) NHS Institute for Innovation and Improvement. An economic evaluation of alternatives to antipsychotic drugs for individuals living with dementia. Coventry, UK: Coventry House; 2011.
- (46) Adelman RD, Tmanova LL, Delgado D, Dion S, Lachs MS. Caregiver burden: A clinical review. 2014;311:1052-9.
- (47) Mohamed S, Rosenheck R, Lyketsos CG, Kaczynski R, Sultzer DL, Schneider LS. Effect of second-generation antipsychotics on caregiver burden in Alzheimer's disease. J Clin Psychiatry 2012 Jan;73(1):121-8.
- (48) Hurd MD, Martorell P, Delavande A, Mullen KJ, Langa KM. Monetary costs of dementia in the United States. N Engl J Med 2013 Apr 4;368(14):1326-34.
